# Supplementary material
Source: MDPI journal article supplement (https://www.mdpi.com/2410-390X/2/2/5)
Supplement: s1 [file s1]

**Electronic Supplementary Information For:**

**A Low-Cost, Simplified Platform of Interchangeable, Ambient Ionization  
Sources for Rapid, Forensic Evidence Screening on Portable Mass  
Spectrometric Instrumentation**

Patrick W. Fedick<sup>1</sup>, William L. Fatigante<sup>2</sup>, Zachary E. Lawton<sup>2</sup>, Adam E. O’Leary<sup>2</sup>, Seth. E. Hall<sup>2</sup>, Ryan M. Bain<sup>1</sup>, Stephen T. Ayrton<sup>1</sup>, Joseph A. Ludwig<sup>2</sup>, and Christopher C. Mulligan<sup>2\*</sup>

<sup>1</sup>Department of Chemistry, Purdue University, West Lafayette, Indiana, 47907, USA

<sup>2</sup>Department of Chemistry, Illinois State University, Normal, Illinois, 61790, USA

\*Corresponding Author – [mulligan@ilstu.edu](mailto:mulligan@ilstu.edu)

| <b><u>Table of Contents</u></b>                                      | <b><u>Page</u></b> |
|----------------------------------------------------------------------|--------------------|
| FLIR AI-MS 1.2 portable mass spectrometer                            | <b>S-3</b>         |
| Factory-built ESI/DESI combination source                            | <b>S-4</b>         |
| Part list and estimated cost for modular ionization sources          | <b>S-5</b>         |
| Estimated cost for swab and cone consumables                         | <b>S-7</b>         |
| Photos of authentic evidence analyzed via modular ionization sources | <b>S-8</b>         |
| Alternate and internal views of the modular sources                  | <b>S-9</b>         |
| Absolute intensity obtained in reported MS spectra                   | <b>S-11</b>        |

### **FLIR AI-MS 1.2 Portable Mass Spectrometer**

The FLIR AI-MS 1.2 portable MS system is a ruggedized CIT-based instrument capable of MS/MS chemical identification. The miniaturized vacuum system on-board the AI-MS 1.2 allows sampling of externally-generated ions in both positive and negative ion modes via a capillary-based atmospheric pressure inlet. All AC/DC voltages needed for instrument operation and modular ambient ionization sources described in this work are built in, as well as an on-board syringe pump for solvent delivery when necessary (i.e. ESI, DESI, STSI) and a cartridge-based helium supply for the CIT damping gas. The instrument is flexible in regards to input voltage, allowing the use of 110/220 VAC or 24V DAC service, and can be easily operated by a small, gas-powered generator. The size (24" x 20" x 15", L x W x H), weight (44 kg) and ruggedness of this instrument makes it an amenable platform for field-based applications like crime scene investigation, law enforcement and environmental monitoring.

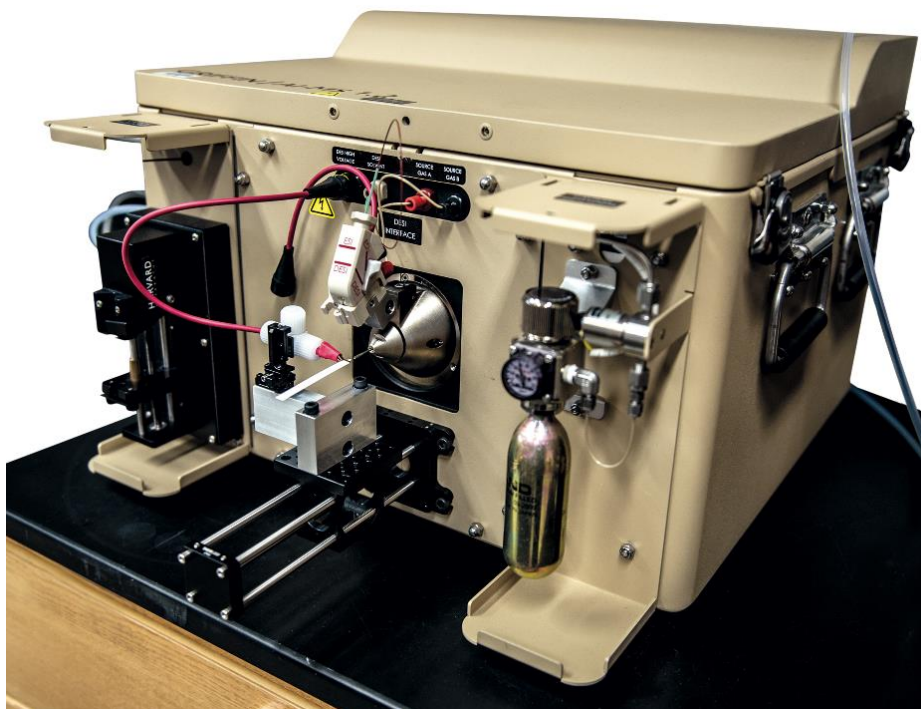

**Figure S-1.** FLIR Systems AI-MS 1.2 portable, cylindrical ion trap (CIT) mass spectrometer ruggedized for field usage. All required consumables for the modular ambient ionization sources, including flowed solvents and voltage, are on-board in shown form factor. Photo courtesy of Illinois State University

## **Factory-Built ESI/DESI Combination Source**

The FLIR Systems AI-MS 1.2 includes a removable, factory-built combination source capable of both ESI-MS and DESI-MS (Figure S-2). This position-stationary source is mounted to fix both the DESI spray angle (55°) and sprayer tip-to-surface distance. The DESI sprayer is held in a hemispherical enclosure (Figure S-3), and once relatively-flat samples (such as glass slides, as seen in Figure S-4) are placed at the enclosure opening, they undergo desorption/ionization. As seen in Figure S-5, swabs can also be investigated with the source, allowing more geometrically complex samples to be screening via surface transfer experiments.

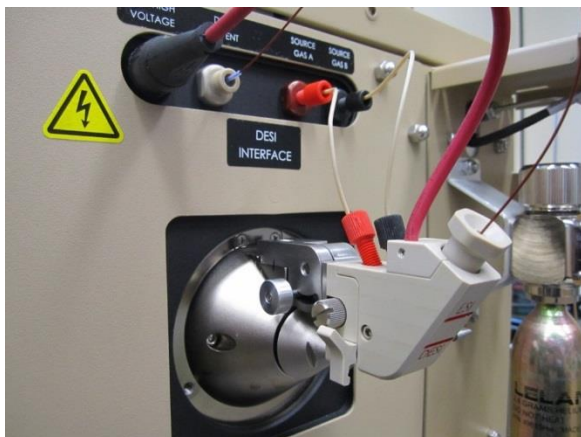

**Figure S-2.** Combination ESI/DESI source included with the FLIR AI-MS 1.2. ESI-MS is useful when examining extracts and dilute solution, while DESI-MS has proven is useful for the direct analysis of surfaces of simple geometry.

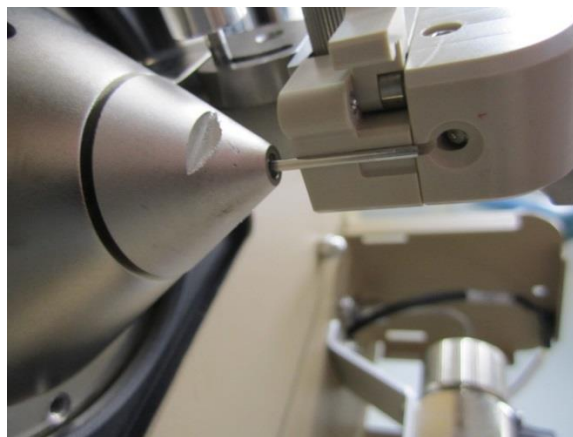

**Figure S-3.** Bottom-up view of the ESI/DESI emitter in relation to the inlet capillary of the AI-MS 1.2. The hemispherical enclosure allows placement of flat materials for sampling.

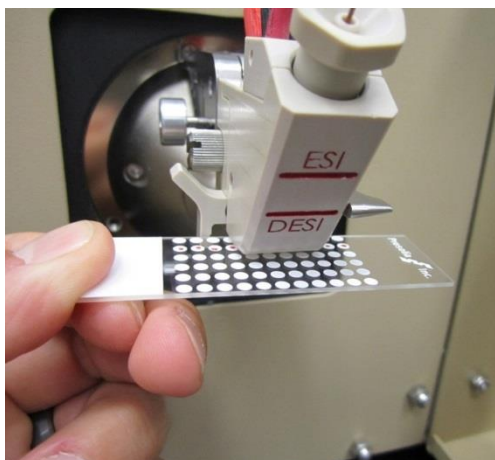

**Figure S-4.** DESI-MS analysis depicted from printed Teflon well slides (Omni Slides, Prosolia, Inc., Indianapolis, IN)

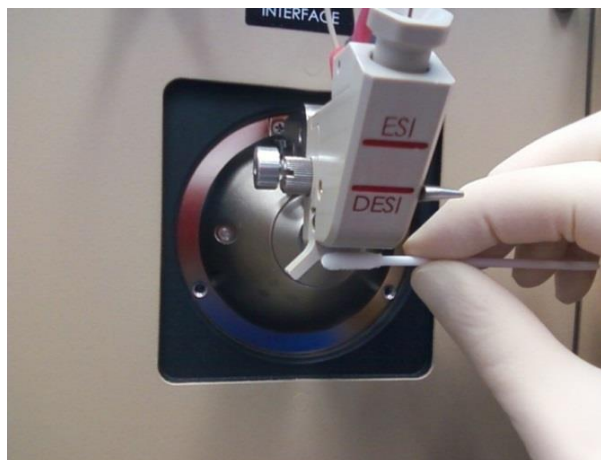

**Figure S-5.** DESI-MS analysis depicted directly from foam-based, surface-transfer swabs (Lab-Tips foam swab, Berkshire Corporation, Great Barrington, MA)

**Table S-1: Part List and Estimated Cost for Modular Ionization Sources (as of 2/13/2018)**

| <b>Company</b>    | <b>Part Number</b> | <b>Part Description</b>                                           | <b>Price</b>                       |
|-------------------|--------------------|-------------------------------------------------------------------|------------------------------------|
| <b>Rail Mount</b> |                    |                                                                   | <b>Total = \$92.95</b>             |
| Thorlabs          | CPVM               | Vertical Mounting Plate for 30 mm and 60 mm Cage Systems          | \$43.86                            |
| Thorlabs          | ER6-P4             | Cage Assembly Rod, 6" Long, Ø6 mm, 4 Pack                         | \$32.87                            |
| Thorlabs          | CP01               | Blank 30 mm Cage Plate, 0.35" Thick, 8-32 Tap                     | \$16.22                            |
| <b>PSI</b>        |                    |                                                                   | <b>Total = \$462.92 – \$513.92</b> |
| iPolymer          | UC-F-4-HA          | Union Cross, 1/4" Tube OD                                         | \$61.08                            |
| Newark            | 82R5350            | Toothless Solid Copper Alligator Clip                             | \$0.53                             |
| OptoSigma         | 123-7127*          | Leadscrew Slide, 15 x 15 XYZ Metric                               | \$300.00 -<br>\$351.00             |
| Thorlabs          | C6W                | 30 mm Cage Cube, Ø6 mm Through Holes                              | \$63.75                            |
| Thorlabs          | UBP2               | Universal Base Plate, 2.5" x 2.5" x 3/8"                          | \$36.47                            |
| Digi-Key          | WM2953CT-ND        | Terminal Connector Female, Receptacle (Socket) 18-22 AWG          | \$0.57                             |
| Digi-Key          | WM18267-ND         | Terminal Connector Male, Pin (Plug) 18-22 AWG                     | \$0.52                             |
| <b>PCSI</b>       |                    |                                                                   | <b>Total = \$151.01</b>            |
| Newark            | 82R5350            | Toothless Solid Copper Alligator Clip                             | \$0.53                             |
| Thorlabs          | AI25E8E            | Adapter with Internal 1/4"-20 Threads and Internal 8-32 Threads   | \$4.90                             |
| Thorlabs          | RA180              | Right-Angle End Clamp for Ø1/2" Posts, 1/4"-20 Stud and 3/16" Hex | \$10.81                            |
| Thorlabs          | TR3C               | Ø1/2" Optical Construction Post, SS, #8 Counterbores              | \$16.73                            |
| Thorlabs          | TR3T               | Ø1/2" Optical Construction Post, SS, 8-32 Taps                    | \$16.73                            |
| Thorlabs          | C6W                | 30 mm Cage Cube, Ø6 mm Through Holes                              | \$63.75                            |
| Thorlabs          | UBP2               | Universal Base Plate, 2.5" x 2.5" x 3/8"                          | \$36.47                            |
| Digi-Key          | WM2953CT-ND        | Terminal Connector Female, Receptacle (Socket) 18-22 AWG          | \$0.57                             |
| Digi-Key          | WM18267-ND         | Terminal Connector Male, Pin (Plug) 18-22 AWG                     | \$0.52                             |
| <b>STSI</b>       |                    |                                                                   | <b>Total = \$235.73</b>            |
| Agilent           | 160-1010-5         | Deactivated Fused Silica, 5 m, 0.10 mm, 0.19 mm OD                | \$112.00                           |
| IDEX              | U-112              | Stainless Steel Tubing 1/16" OD x .010 ID - 10cm                  | \$4.94                             |
| Newark            | 82R5350            | Toothless Solid Copper Alligator Clip                             | \$0.53                             |
| Thorlabs          | RA90               | Right-Angle Clamp for Ø1/2" Posts, 3/16" Hex                      | \$9.76                             |
| Thorlabs          | TR8                | Ø1/2" Optical Post, SS, 8-32 Setscrew, 1/4"-20 Tap, L = 8"        | \$8.28                             |
| Thorlabs          | C6W                | 30 mm Cage Cube, Ø6 mm Through Holes                              | \$63.75                            |
| Thorlabs          | UBP2               | Universal Base Plate, 2.5" x 2.5" x 3/8"                          | \$36.47                            |

| <b>APCI</b>                                           |             |                                                                        | <b>Total = \$380.64</b> |
|-------------------------------------------------------|-------------|------------------------------------------------------------------------|-------------------------|
| Hamilton                                              | 18304       | Cleaning Wires for 22, 23, and Larger Gauge Needles                    | \$11.00                 |
| IDEX                                                  | U-102       | Stainless Steel Tubing 1/16" OD x .020 ID - 10cm                       | \$4.56                  |
| iPolymer                                              | FRT-F-42-HA | Female Run Tee, 1/4" Tube OD                                           | \$47.63                 |
| iPolymer                                              | MRT-F-42-HA | Male Run Tee, 1/4" Tube OD                                             | \$47.63                 |
| KNF<br>Neuberger                                      | NMP830KNDC  | Micro Diaphragm Gas Pump DC 12V, 3.1 L/min                             | \$146.00                |
| Newark                                                | 66K6838     | Through Hole Resistor, 100 M $\Omega$ , Mini-Mox Series, 7500 V, 1.5 W | \$8.11                  |
| Thorlabs                                              | CL3/M       | Compact Variable Height Clamp, M6 Tapped                               | \$5.15                  |
| Thorlabs                                              | BA1         | Mounting Base, 1" x 3" x 3/8"                                          | \$5.60                  |
| Thorlabs                                              | TR1         | Ø1/2" Optical Post, SS, 8-32 Setscrew, 1/4"-20 Tap, L = 1"             | \$4.74                  |
| Thorlabs                                              | C6W         | 30 mm Cage Cube, Ø6 mm Through Holes                                   | \$63.75                 |
| Thorlabs                                              | UBP2        | Universal Base Plate, 2.5" x 2.5" x 3/8"                               | \$36.47                 |
| <b>Other</b>                                          |             |                                                                        | <b>Total = \$112.79</b> |
| Newark                                                | 63H2515     | Test Lead Wire, Silicone, 18 AWG, 50 feet (15.2 Meter) Length, Red     | \$26.99                 |
| McMaster-Carr                                         | 8975K213    | Multipurpose 6061 Aluminum, 6" x 6" x 3/8"                             | \$11.22                 |
| McMaster-Carr                                         | 8975K244    | Multipurpose 6061 Aluminum, 6" x 6" x 1"                               | \$24.58                 |
| McMaster-Carr                                         | Various     | Various Screws                                                         | \$50                    |
| <b>Grand Total = \$1436.03 – \$1487.03 (plus S/H)</b> |             |                                                                        |                         |

\*Product was discontinued by Thorlabs. Product TAS-24305L could be used alternatively

**Table S-2: Estimated Cost (per Sample) for Swab and Cone Consumables (as of 2/13/2018)**

| <b>Company</b>     | <b>Part Number</b> | <b>Part Description</b>                                           | <b>Price</b> |
|--------------------|--------------------|-------------------------------------------------------------------|--------------|
| <b>Consumables</b> |                    |                                                                   |              |
| Fisher Scientific  | 1118600001         | Millipore MQuant Blank Strips (Without Reagent), Box of 100       | \$0.60/Strip |
| Copan Diagnostics  | 160C               | Plain Swab Sterile Aluminum Applicator Rayon Tipped, Case of 1000 | \$3.12/Swab  |
| Fisher Scientific  | 09-898-12B         | Low-Nitrogen Weighing Paper, Pack of 500                          | \$0.09/Cone  |



**Photos of Authentic Evidence Analyzed via Modular Ionization Sources on the AI-MS 1.2**

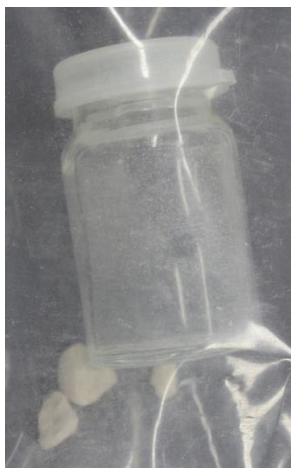

**Figure S-6.** Seized heroin evidence analyzed via PSI-MS

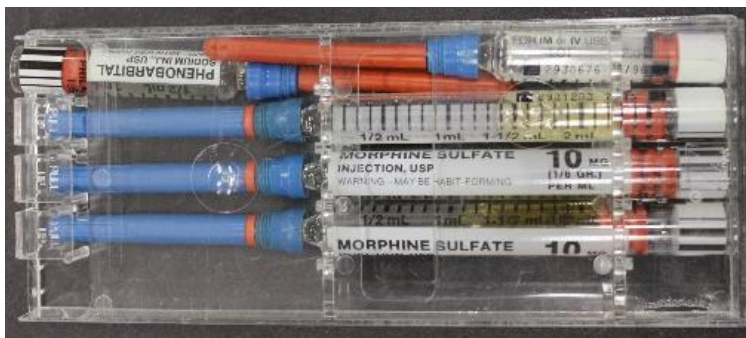

**Figure S-7.** Seized morphine sulphate injectable syringe analyzed via PSI-MS

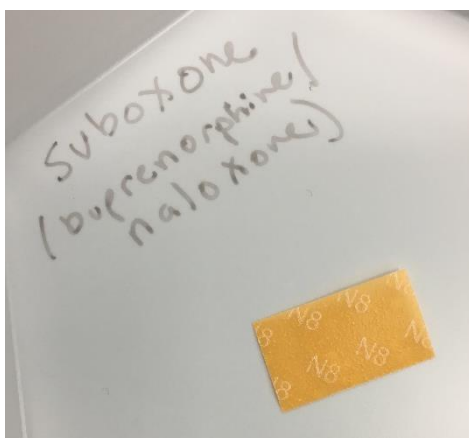

**Figure S-8.** Suboxone<sup>®</sup> sublingual film analyzed via PCSI-MS



### Alternate and Internal Views of the Modular Sources

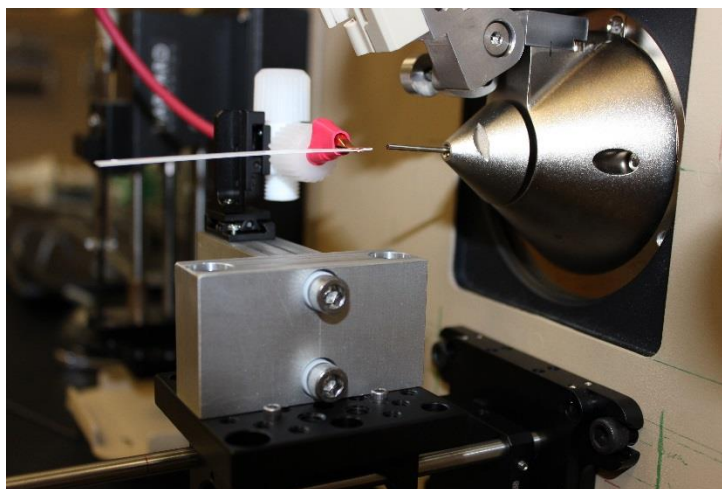

**Figure S-9.** Side-view of PSI source module

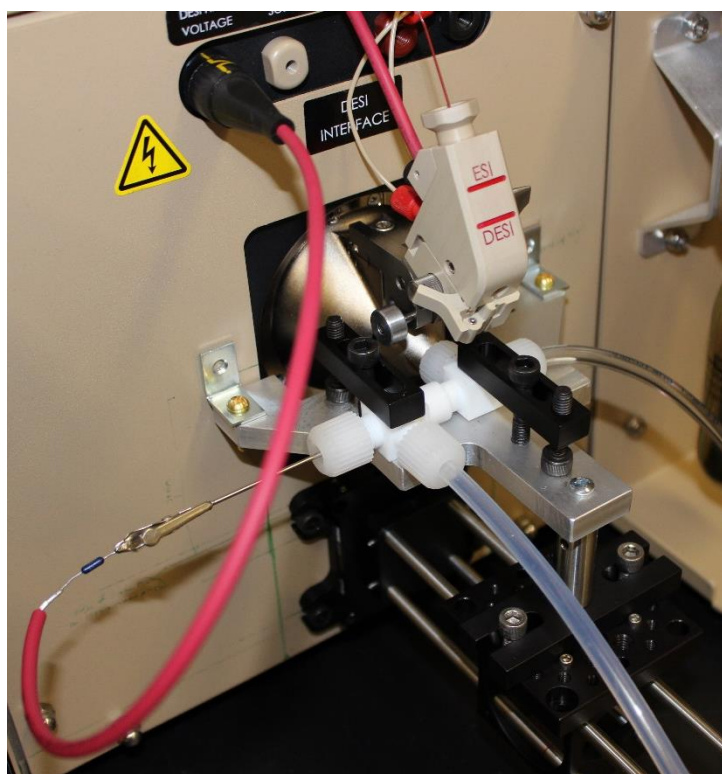

**Figure S-10.** Left-hand view of APCI source, including HV hookup and clamping

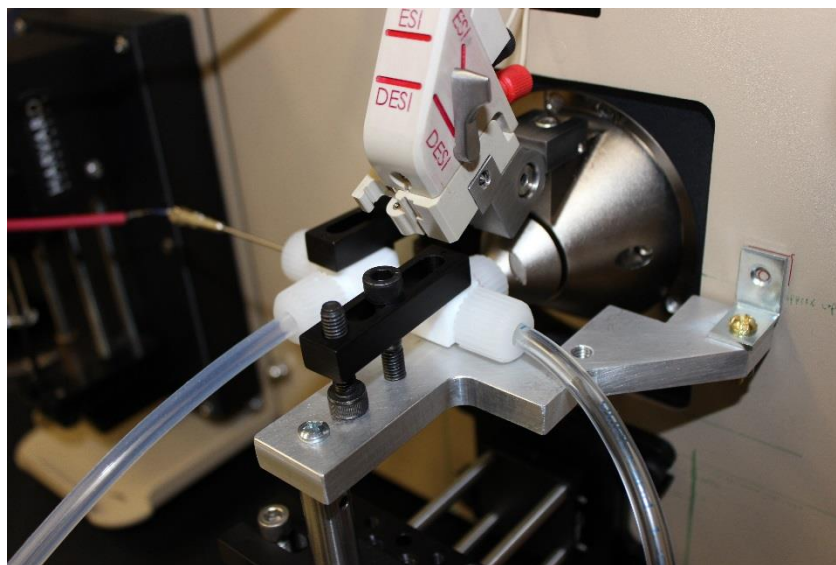

**Figure S-11.** Right-hand view of APCI source, including HV hookup and clamping

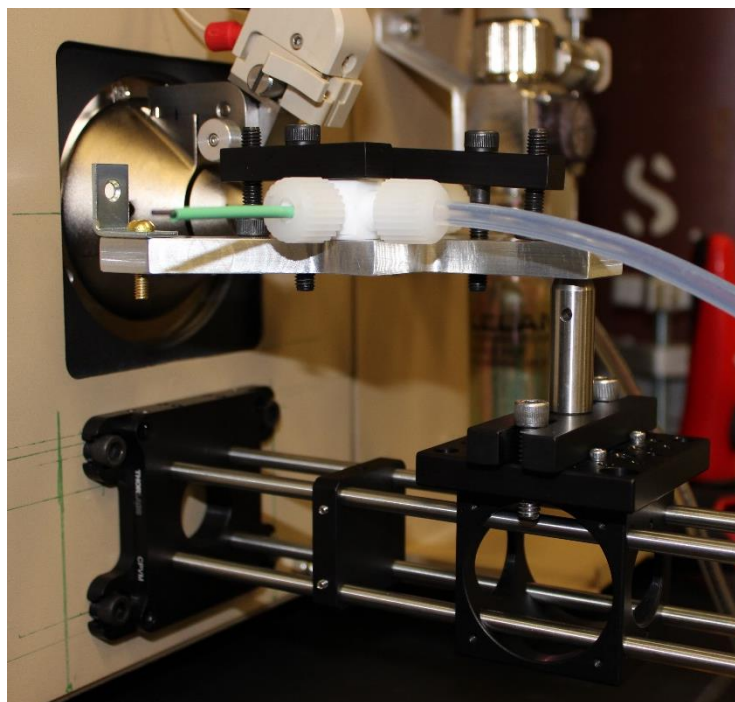

**Figure S-12.** Side view of APCI source module

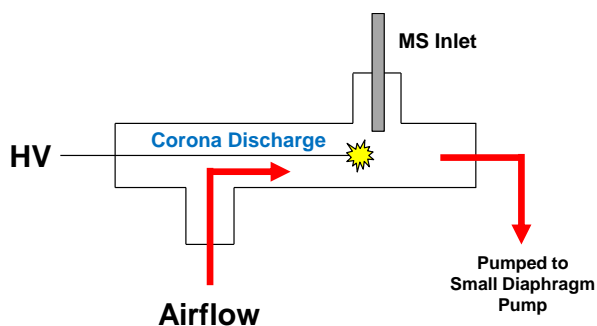

**Figure S-13.** Schematic of top, internal view of discharge region of the APCI source

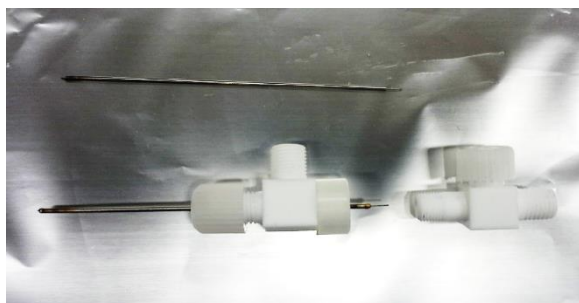

**Figure S-14.** Photo of simply-crafted discharge needle from syringe cleaning wire and stock SS LC capillary.

### **Absolute Intensity Obtained in Reported MS Spectra**

| <b>Spectrum of Interest</b> | <b>Base Peak</b>           | <b>Absolute Intensity (out of 4000)</b> |
|-----------------------------|----------------------------|-----------------------------------------|
| Figure 3A                   | m/z 370 (Heroin)           | 3786                                    |
| Figure 3C                   | m/z 286 (Morphine)         | 2842                                    |
| Figure 5A                   | m/z 468 (Buprenorphine)    | 4950                                    |
| Figure 7A                   | m/z 269 (Ethyl Centralite) | 2469                                    |
| Figure 9A                   | m/z 59 (Acetone)           | 1731                                    |
| Figure 9C                   | m/z 114 (Caprolactam)      | 3012                                    |
